# Supplementary material for: The multiphase structural evolution and electromagnetic properties driven by Co(iii) ions of La2−xSrxCoMnO6 (x = 0–1.0) polycrystals
Source: Royal Society of Chemistry journal article supplement (doi:10.1039/d4ce00470a), 2024-01-01
Supplement: d4ce00470a1.pdf [file d4ce00470a1.pdf]

## The multiphase structural evolution and electromagnetic properties driven by Co (III) ions of $\text{La}_{2-x}\text{Sr}_x\text{CoMnO}_6$ ( $x = 0\sim 1.0$ ) polycrystals

Xuesong Wang, Hongyuan Song\*, Kun Dong, Ruihang Yao, Haorong Wu, Xiaolong Yang, Liangwei Chen, Bin Liu,  
Zhenhua Ge, Lan Yu\*\*

*Faculty of Materials Science and Engineering, Kunming University of Science and Technology, Kunming, 650093,  
PR China*

\* *Corresponding Authors: songhongyuan0227@outlook.com (Hongyuan Song), yulan000@hotmail.com (Lan Yu).*

The standard crystal structure cif card used for XRD structural refinement is as follows:

Monoclinic crystal system of ordered phase  $\text{La}_2\text{CoMnO}_6$  ( $P2_1/n$ , ICSD #98240);

Orthorhombic crystal system of disordered phase  $\text{La}_2\text{CoMnO}_6$  ( $Pbnm$ , ICSD #151836);

Rhombohedral crystal system of  $\text{La}_{1.6}\text{Sr}_{0.4}\text{CoMnO}_6$  ( $R3c$ , ICSD #151839);

Cubic crystal system of  $\text{LaSrCoMnO}_6$  ( $Fm-3m$ , ICSD # 96530).

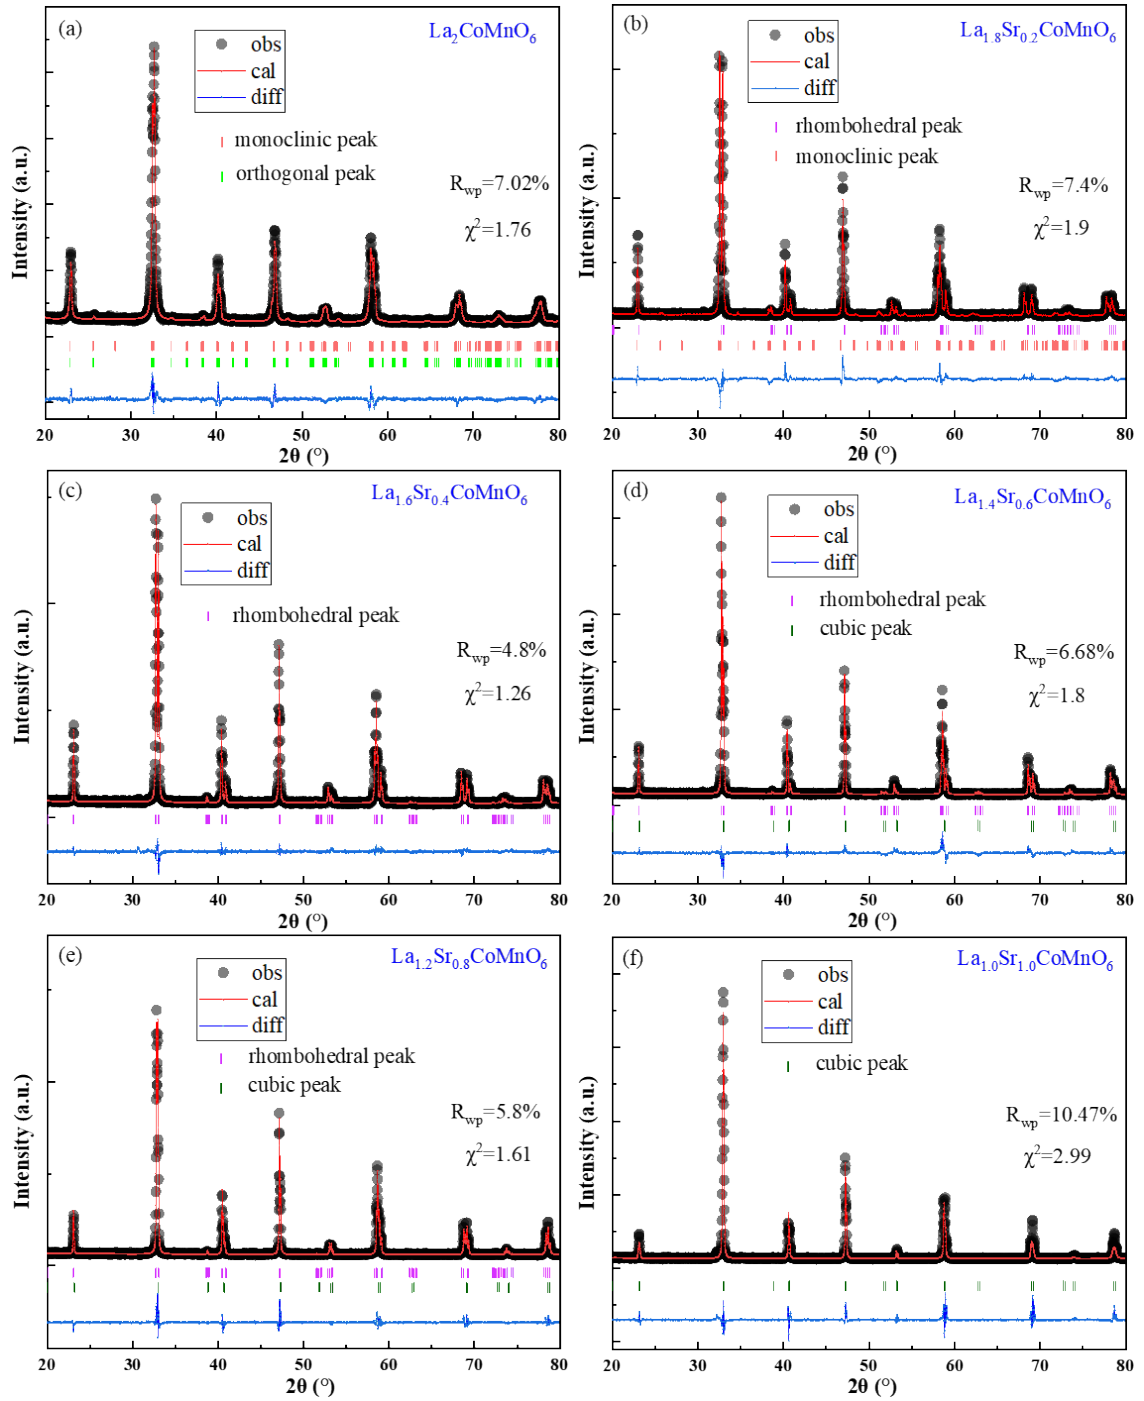

**Fig. S1.** XRD structural refinement profiles of  $\text{La}_{2-x}\text{Sr}_x\text{CoMnO}_6$  ceramics (a)  $x = 0$ , (b)  $x = 0.2$ , (c)  $x = 0.4$ , (d)  $x = 0.6$ , (e)  $x = 0.8$ , (f)  $x = 1.0$ .

**Tab. S1.** Oxidation states, coordination numbers, and corresponding ionic radii of the elements  $r_c$ .

| Element | Oxidation | Coordination Number | $r_c/\text{\AA}$ |
|---------|-----------|---------------------|------------------|
| La      | +3        | XII                 | 1.36             |
| Sr      | +2        | XII                 | 1.44             |
| Co      | +2        | VI                  | 0.745            |
|         | +3        | VI                  | 0.61             |
| Mn      | +3        | VI                  | 0.654            |
|         | +4        | VI                  | 0.53             |
| O       | -2        | VI                  | 1.4              |

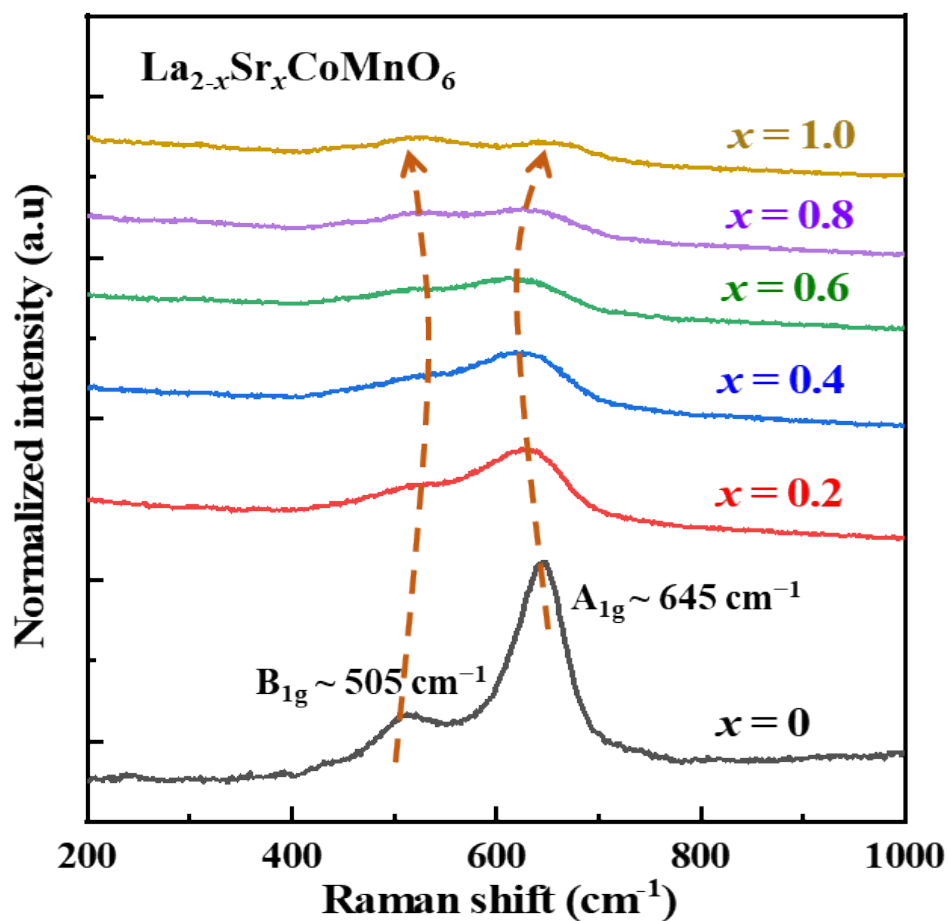

**Fig. S2.** Raman spectra of  $\text{La}_{2-x}\text{Sr}_x\text{CoMnO}_6$  ( $x = 0\sim 1.0$ ) ceramics.

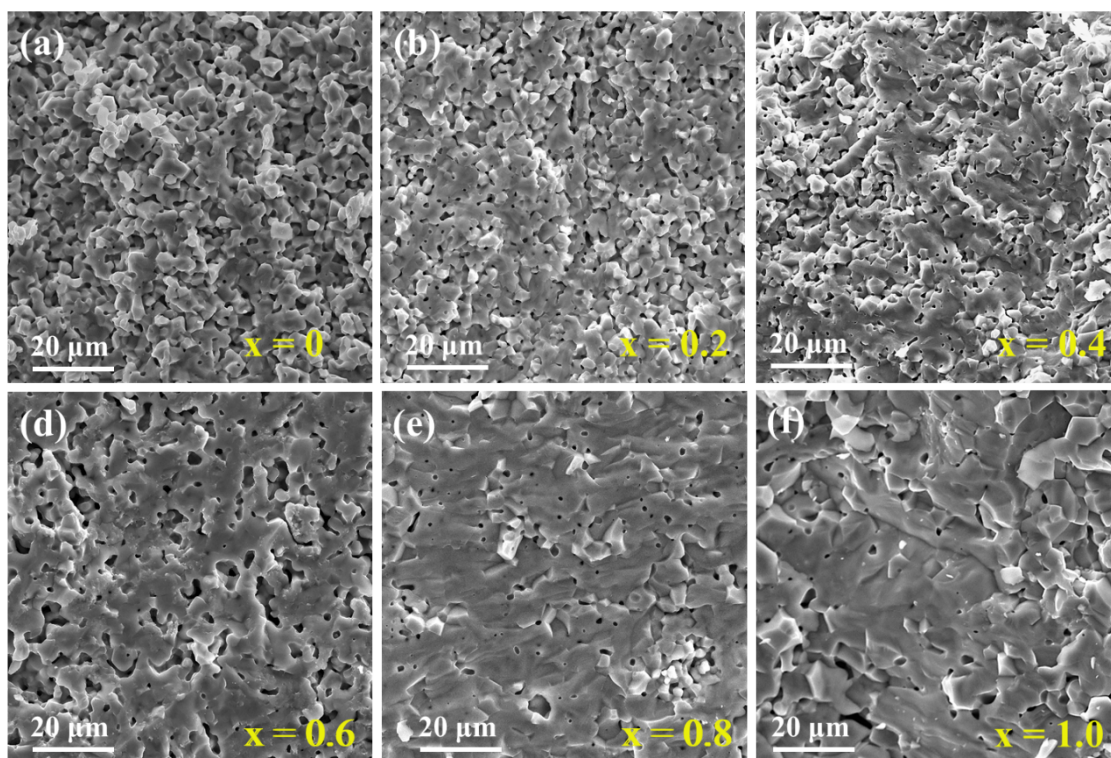

**Fig. S3.** SEM topography of  $\text{La}_{2-x}\text{Sr}_x\text{CoMnO}_6$  ceramics

(a)  $x = 0$ , (b)  $x = 0.2$ , (c)  $x = 0.4$ , (d)  $x = 0.6$ , (e)  $x = 0.8$ , (f)  $x = 1.0$ .

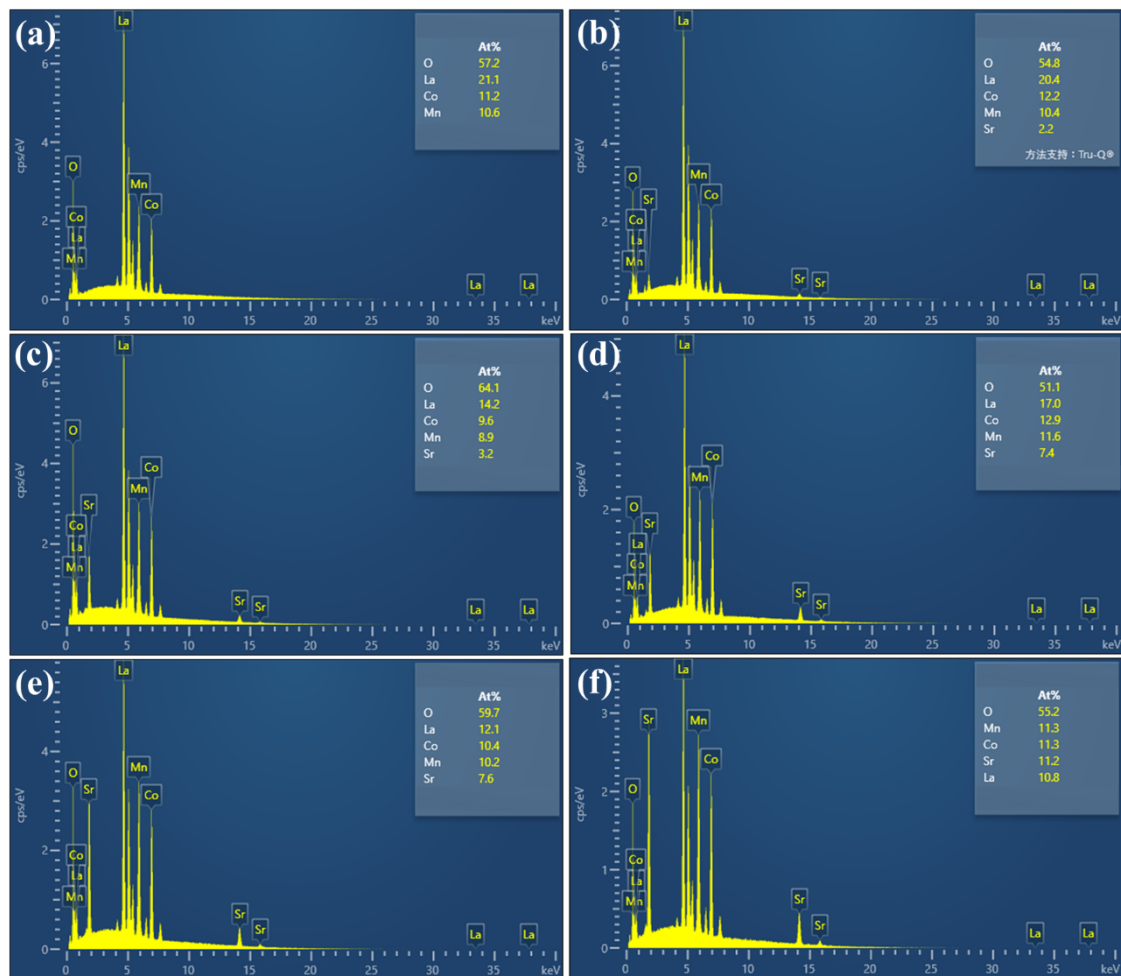

**Fig. S4.** Atomic ratio of element distribution in EDS atlas of  $\text{La}_{2-x}\text{Sr}_x\text{CoMnO}_6$  ceramics (At%) (a)  $x = 0$ , (b)  $x = 0.2$ , (c)  $x = 0.4$ , (d)  $x = 0.6$ , (e)  $x = 0.8$ , (f)  $x = 1.0$ .

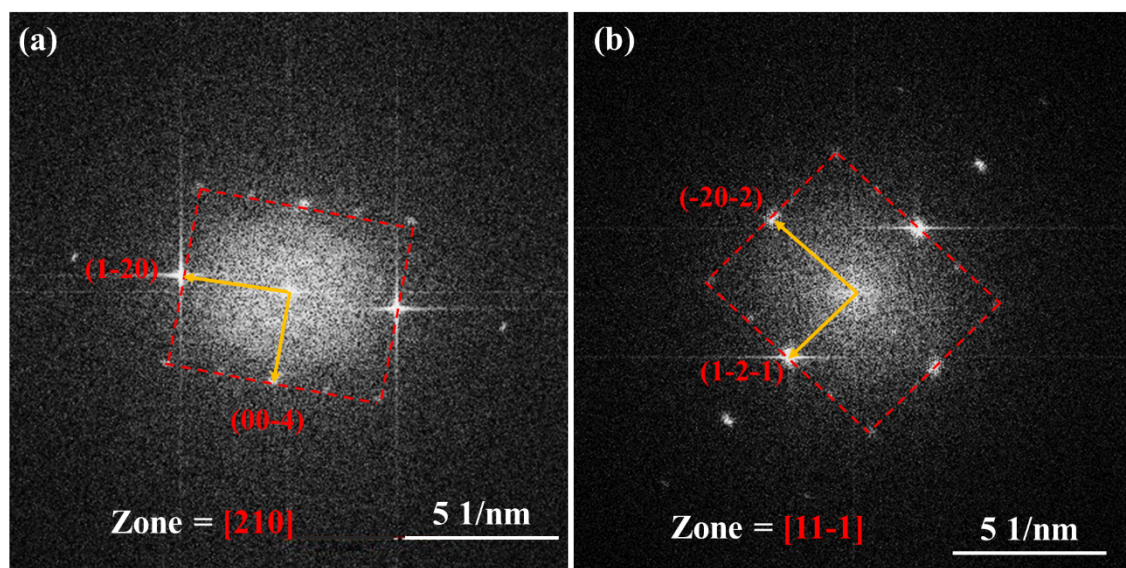

**Fig. S5.** (a) FFT diagram corresponding to LS0.4CMO along the crystal band axis  $[210]$ ; (b) corresponding to LSCMO FFT diagram along the  $[11-1]$  band axis.

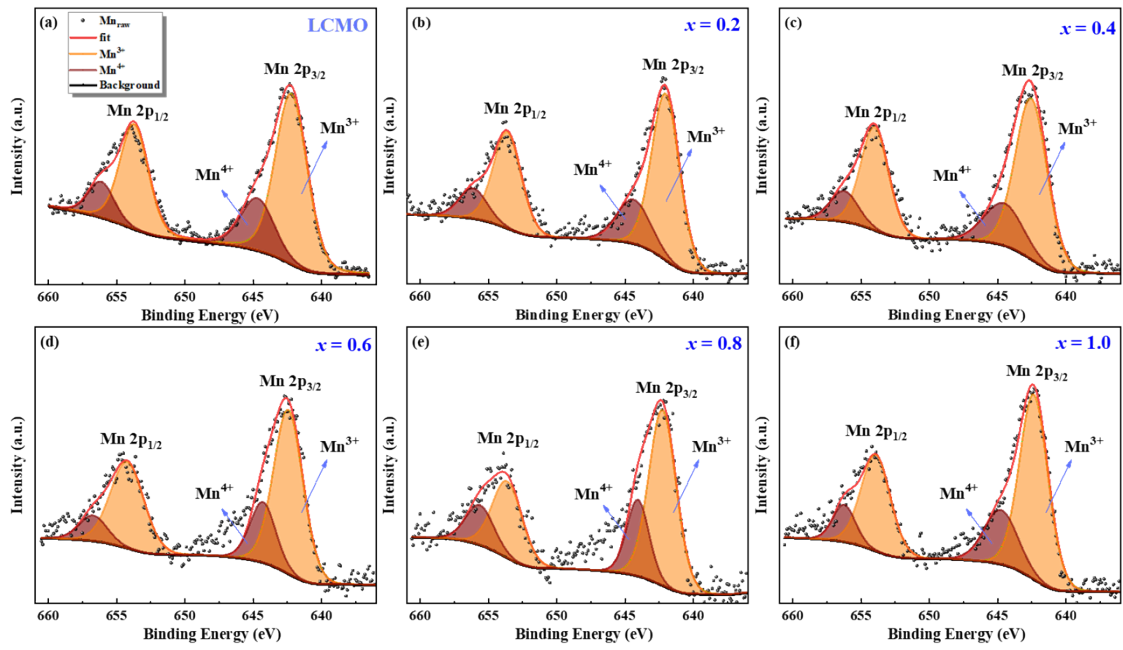

**Fig. S6.** Mn ion binding energy and fitting map of LS<sub>x</sub>CMO samples (a)  $x = 0$ , (b)  $x = 0.2$ , (c)  $x = 0.4$ , (d)  $x = 0.6$ , (e)  $x = 0.8$ , (f)  $x = 1.0$ .

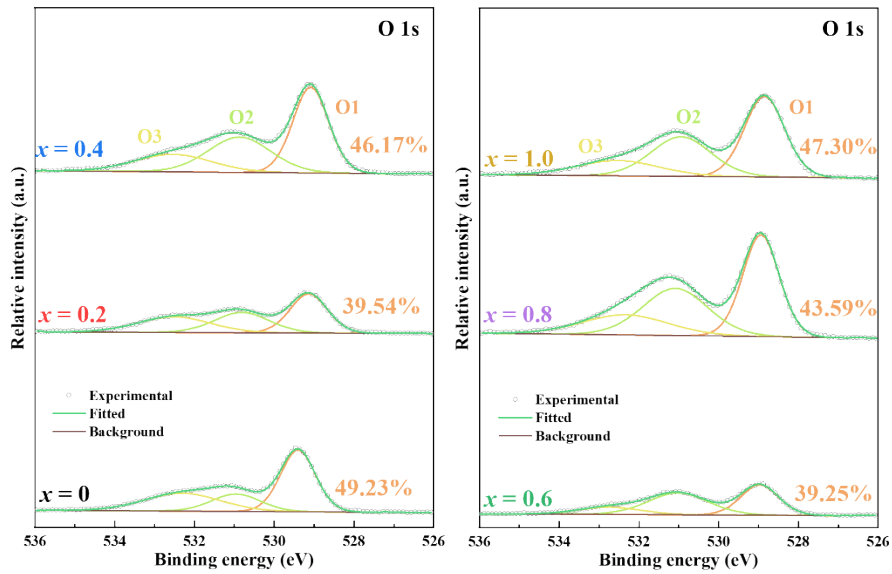

**Fig. S7.** Deconvoluted O-1s XPS spectra of La<sub>2-x</sub>Sr<sub>x</sub>CoMnO<sub>6</sub> ( $x = 0 \sim 1.0$ ) ceramics.

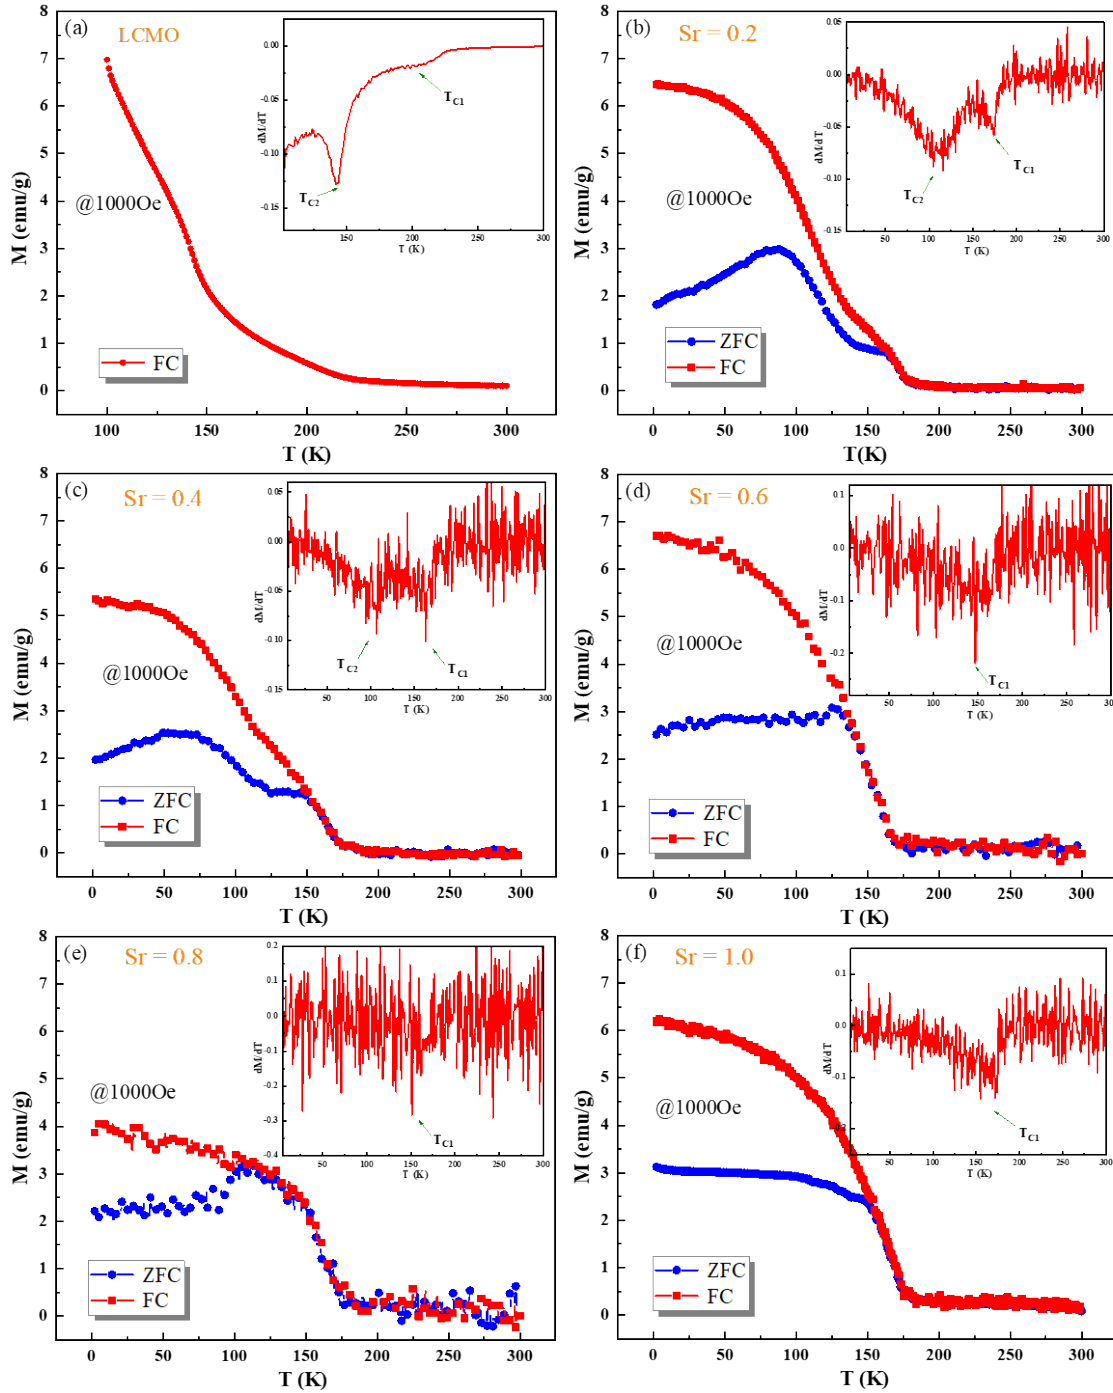

**Fig. S8.**  $M$ - $T$  data under ZFC and FC modes for 1000 Oe field in the LS $x$ CMO samples (a)  $x = 0$ , (b)  $x = 0.2$ , (c)  $x = 0.4$ , (d)  $x = 0.6$ , (e)  $x = 0.8$ , (f)  $x = 1.0$ , and the inset of their respective figures represents the first derivative of ZFC magnetization with temperature.
